# Supplementary material for: Effects of Endogenous Anti-Oxidative Components from Different Vegetable Oils on Their Oxidative Stability
Source: MDPI journal article supplement (doi:10.3390/foods12112273), 2023-06-05
Supplement: s1 [file s1]

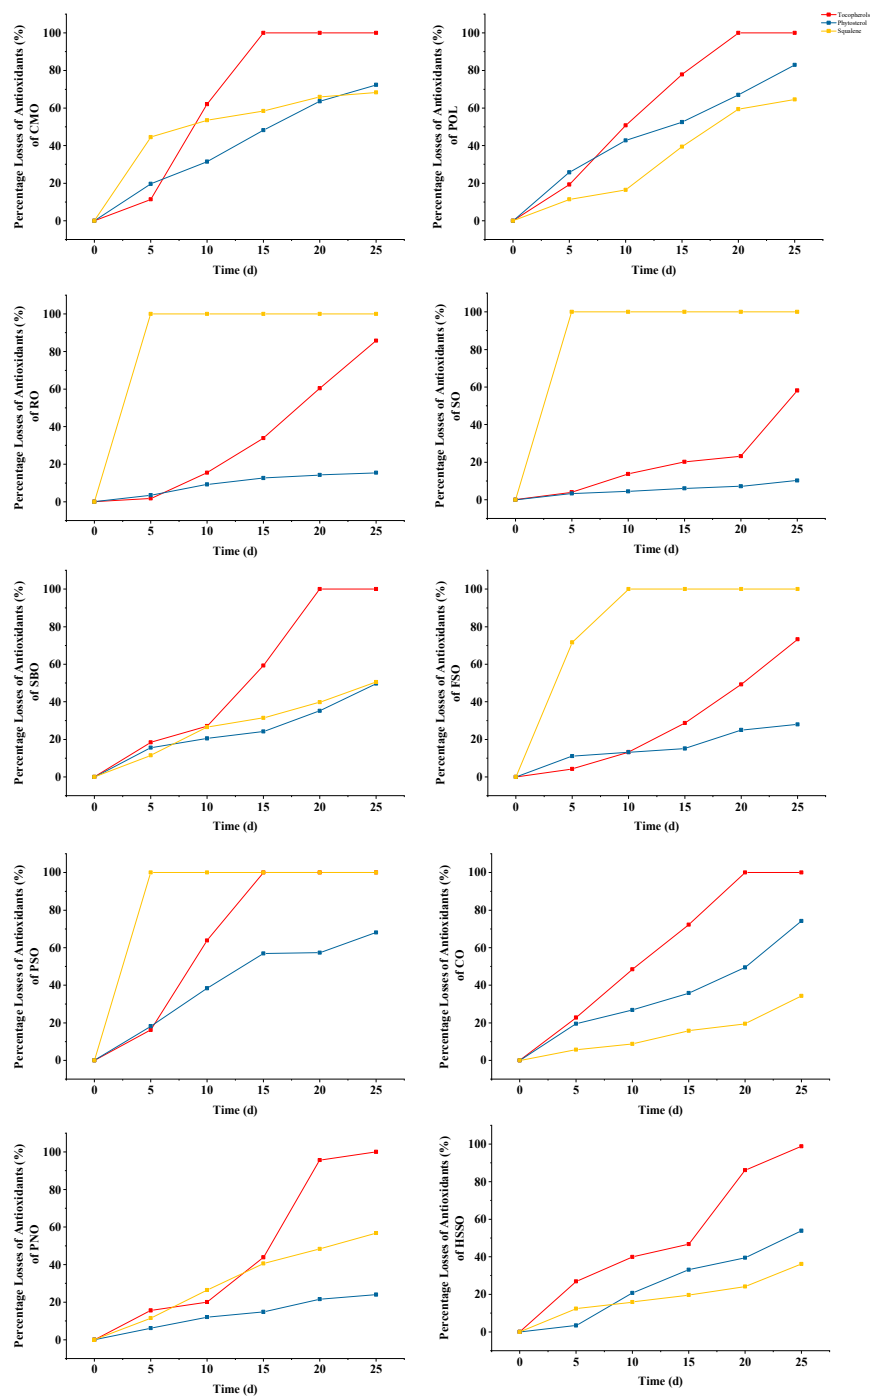

**Figure S1.** Changes of the percentage losses of endogenous antioxidant components in different edible vegetable oils during accelerated oxidation test. POL: Palm olein; CO: Corn Oil; PSO: Perilla Seed Oil; PNO: Peanut Oil; CMO: Camellia seed Oil; RO: Rapeseed oil; SBO: Soybean Oil; HSSO: High Oleic Acid Sunflower Seed Oil; FSO: Flaxseed Oil; SO: Sesame Oil.

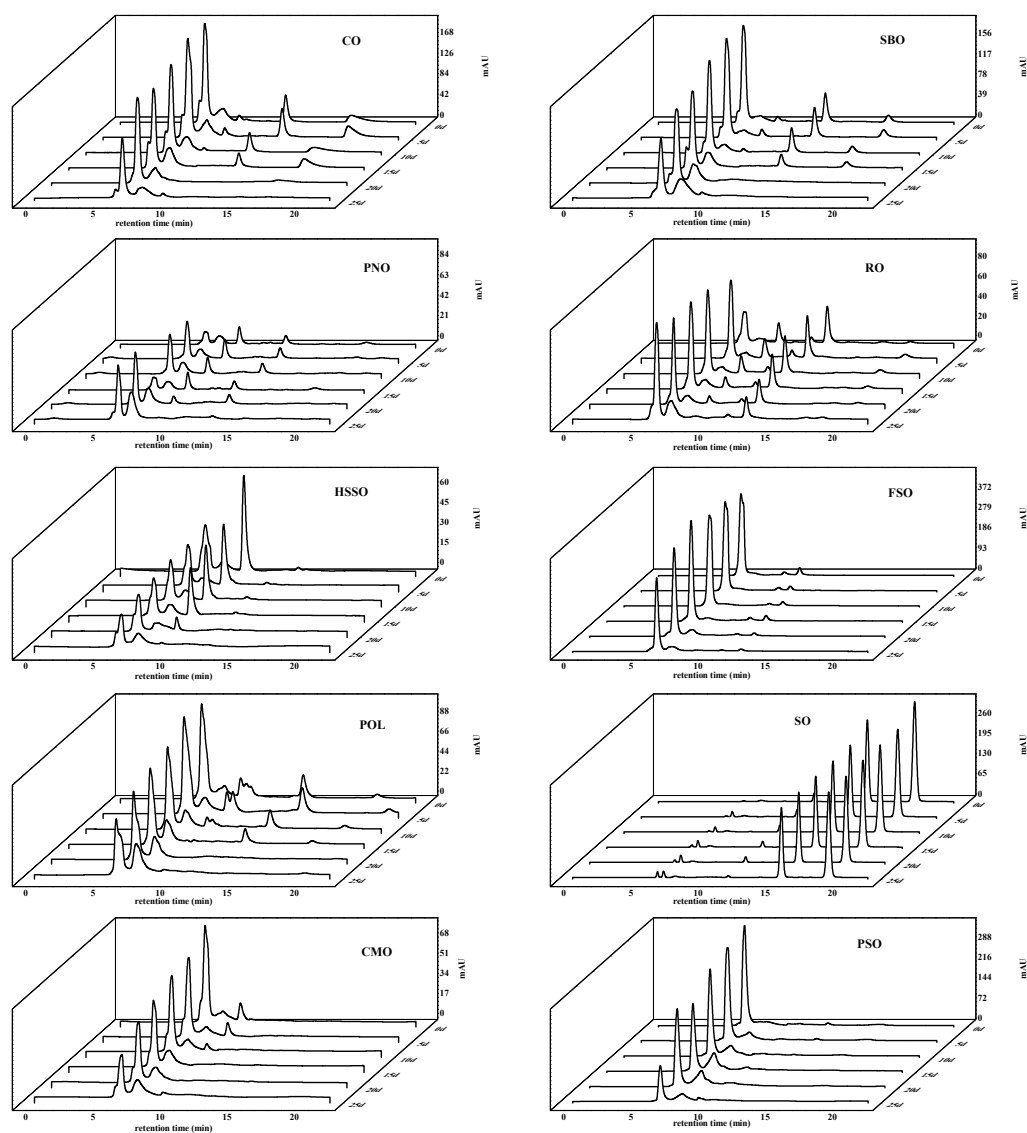

**Figure S2.** HPLC-VWD chromatograms of at 295 nm for tocopherols in ten edible vegetable oils during oxidation. POL: Palm olein; CO: Corn Oil; PSO: Perilla Seed Oil; PNO: Peanut Oil; CMO: Camellia seed Oil; RO: Rapeseed oil; SBO: Soybean Oil; HSSO: High Oleic Acid Sunflower Seed Oil; FSO: Flaxseed Oil; SO: Sesame Oil.

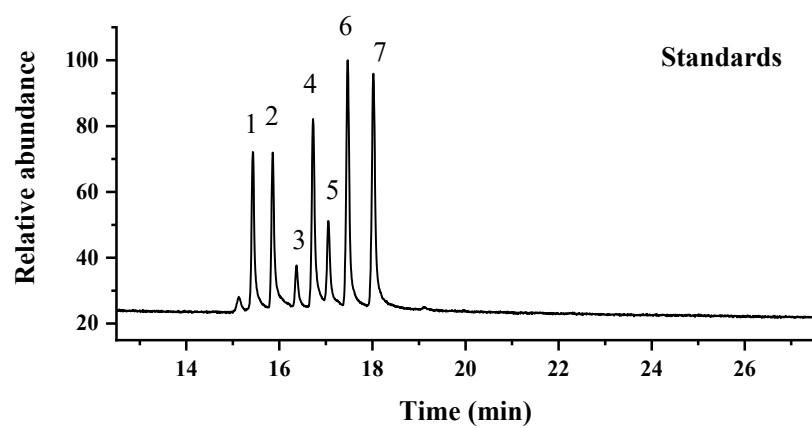

**Figure S3.** The total ion chromatogram (TIC) of seven phytosterol standards. 1- Campesterol; 2- Stigmasterol; 3- Ergosta-4,6,22-tri; 4- $\beta$ -sitosterol; 5- Lanosterol; 6- $\beta$ -Amyrin; 7- Cycloartenol.

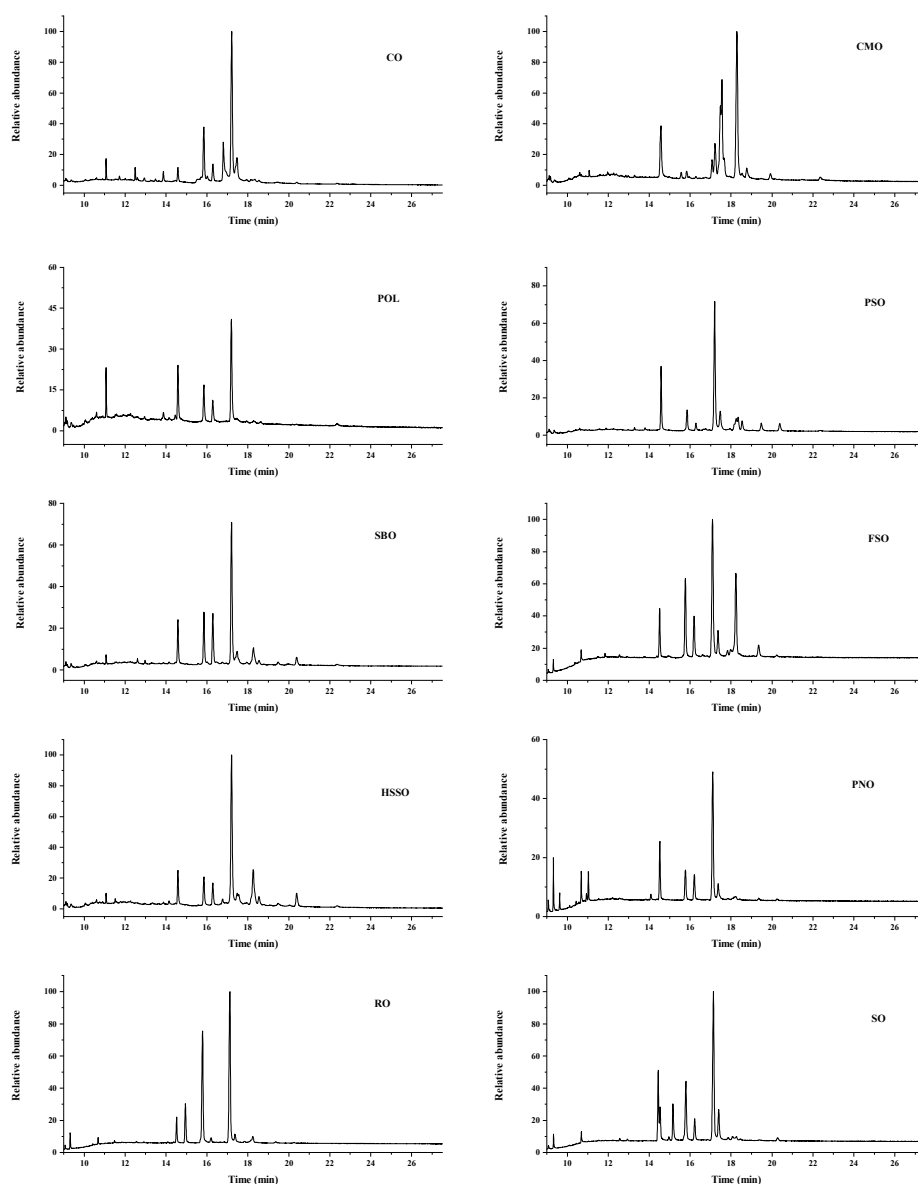

**Figure S4.** The total ion chromatogram (TIC) in ten edible vegetable oils. POL: Palm olein; CO: Corn Oil; PSO: Perilla Seed Oil; PNO: Peanut Oil; CMO: Camellia seed Oil; RO: Rapeseed oil; SBO: Soybean Oil; HSSO: High Oleic Acid Sunflower Seed Oil; FSO: Flaxseed Oil; SO: Sesame Oil.

**Table S1.** The results of identification of squalene and sterol in ten edible vegetable oils by GC-MS.

| Peak No. | Retention time (min) | Compound                                      | Chemical formula                  | [M+H] <sup>+</sup> | Fragment ions(m/z) |
|----------|----------------------|-----------------------------------------------|-----------------------------------|--------------------|--------------------|
| 1        | 11.077               | Squalene                                      | C <sub>30</sub> H <sub>50</sub> O | 69                 | 55, 81             |
| 2        | 14.584               | 5 $\alpha$ -Cholestan-3 $\beta$ -ol           | C <sub>30</sub> H <sub>56</sub> O | 215                | 75, 445            |
| 3        | 14.966               | Ergosta-4,6,22-triene                         | C <sub>28</sub> H <sub>44</sub>   | 380                | 255, 431           |
| 4        | 15.854               | Campesterol                                   | C <sub>28</sub> H <sub>48</sub> O | 382                | 367, 472           |
| 5        | 16.286               | Stigmasterol                                  | C <sub>29</sub> H <sub>48</sub> O | 394                | 379, 484           |
| 6        | 17.218               | $\beta$ -sitosterol                           | C <sub>32</sub> H <sub>58</sub> O | 396                | 381, 482           |
| 6        | 17.397               | Lathosterol                                   | C <sub>27</sub> H <sub>46</sub> O | 386                | 371, 394           |
| 7        | 17.477               | Lanosterol                                    | C <sub>33</sub> H <sub>58</sub> O | 393                | 368, 483           |
| 8        | 17.573               | $\beta$ -Amyrin                               | C <sub>33</sub> H <sub>58</sub> O | 218                | 203, 257           |
| 9        | 18.372               | 9,19-Cyclolanost-24-en-3-ol                   | C <sub>33</sub> H <sub>58</sub> O | 365                | 339, 393           |
| 10       | 19.395               | 24-Methylene-9,19-cyclolanostan-3 $\beta$ -ol | C <sub>31</sub> H <sub>52</sub> O | 422                | 380, 451           |

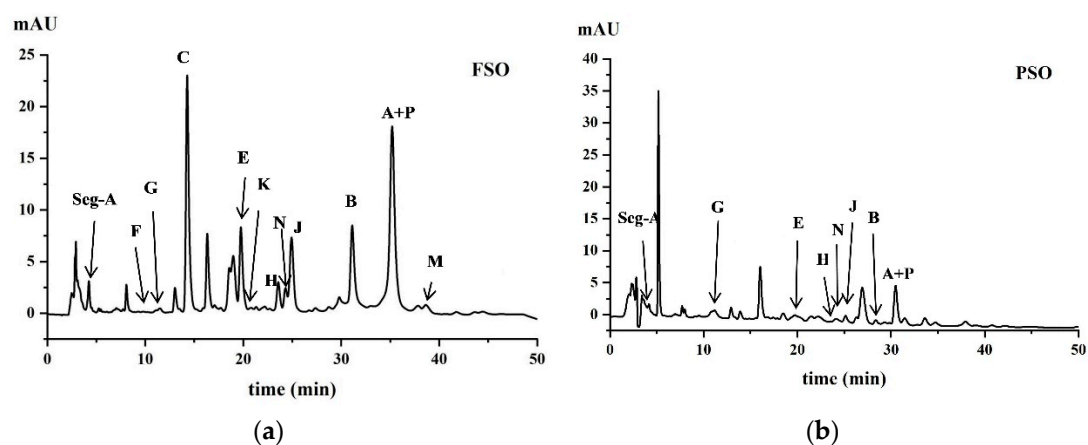

**Figure S5.** The results of identification of cyclolinopeptides by HPLC-ESI-QTOF-MS. PSO: Perilla Seed Oil; FSO: Flaxseed Oil.

**Table S2.** Cyclolinopeptides in flaxseed oil detected using HPLC-QTOF-MS.

| Peak No. | Retention time (min) | Cyclolinopeptides | Amino acid sequence | Chemical formula                                                              | [M+H] <sup>+</sup> | Fragment ions(m/z) |
|----------|----------------------|-------------------|---------------------|-------------------------------------------------------------------------------|--------------------|--------------------|
| 1        | 11.886               | CLF               | cyclo-MsoLMsoPFFWV  | C <sub>55</sub> H <sub>73</sub> N <sub>9</sub> O <sub>10</sub> S <sub>2</sub> | 1084.5017          | 494.4072, 450.3814 |
| 2        | 13.509               | CLG               | cyclo-MsoLMsoPFFWI  | C <sub>56</sub> H <sub>75</sub> N <sub>9</sub> O <sub>10</sub> S <sub>2</sub> | 1098.5185          | 520.3345, 450.3815 |
| 3        | 16.521               | CLC               | cyclo-MsoLIPPFFVI   | C <sub>56</sub> H <sub>83</sub> N <sub>9</sub> O <sub>10</sub> S              | 1074.6112          | 520.3345, 476.3084 |
| 4        | 21.187               | CLE               | cyclo-MsoLVFPLFI    | C <sub>51</sub> H <sub>76</sub> N <sub>8</sub> O <sub>9</sub> S               | 977.5581           | 520.3348, 476.3086 |
| 5        | 21.726               | CLK               | cyclo-MsnLIPPFFVI   | C <sub>56</sub> H <sub>83</sub> N <sub>9</sub> O <sub>11</sub> S              | 1090.606           | 977.5574, 520.335  |
| 6        | 25.233               | CLH               | cyclo-MsoLMPFFWI    | C <sub>56</sub> H <sub>75</sub> N <sub>9</sub> O <sub>9</sub> S <sub>2</sub>  | 1082.5242          | 682.3656, 637.3078 |
| 7        | 26.191               | CLN               | cyclo-MsoLMPFFWI    | C <sub>56</sub> H <sub>75</sub> N <sub>9</sub> O <sub>9</sub> S <sub>2</sub>  | 1082.5245          | 682.3655, 637.3076 |
| 8        | 26.509               | CLJ               | cyclo-MsnLVFPLFI    | C <sub>51</sub> H <sub>76</sub> N <sub>8</sub> O <sub>10</sub> S              | 993.553            | 682.3656, 637.3077 |
| 9        | 31.589               | CLB               | cyclo-MLIPPFFVI     | C <sub>56</sub> H <sub>83</sub> N <sub>9</sub> O <sub>9</sub> S               | 1058.6169          | 620.4399, 576.4135 |
| 10       | 37.334               | CLA               | cyclo-ILVPPFFLI     | C <sub>57</sub> H <sub>89</sub> N <sub>9</sub> O <sub>9</sub>                 | 1040.6602          | 961.5633, 520.3347 |

|    |        |     |                  |                                                                              |          |                    |
|----|--------|-----|------------------|------------------------------------------------------------------------------|----------|--------------------|
| 11 | 37.841 | CLP | cyclo-MLMsoPFFWI | C <sub>51</sub> H <sub>76</sub> N <sub>8</sub> O <sub>8</sub> S              | 961.5433 | 520.3349, 476.3087 |
| 12 | 40.504 | CLM | cyclo-MLLPFFWI   | C <sub>56</sub> H <sub>75</sub> N <sub>9</sub> O <sub>8</sub> S <sub>2</sub> | 1066.529 | 968.7551, 722.5076 |

**Table S3.** Decision matrix for the improved TOPSIS.

| Oils | OSI<br>(h) | ΔSFA<br>(%) | ΔMU<br>FA<br>(%) | ΔPUF<br>A<br>(%) | ΔAV<br>(mg<br>KOH/<br>g) | ΔPOV<br>(mmo<br>l/kg) | Δp-<br>AV | ΔTOT<br>OX | Δα-<br>Tocophero<br>l<br>(mg/kg<br>oil) | Δγ-<br>Tocophero<br>l<br>(mg/kg<br>oil) | ΔTocophe<br>rol<br>(mg/kg<br>oil) | ΔCampeste<br>rol<br>(mg/kg oil) | Δβ-<br>Sitoster<br>ol<br>(mg/kg<br>oil) | ΔStigm<br>asterol<br>(mg/kg<br>oil) | ΔTotal<br>sterol<br>(mg/kg<br>oil) | ΔSquale<br>ne<br>(mg/kg<br>oil) | ΔPolyphen<br>ols<br>(mg<br>GAE/kg<br>oil) |
|------|------------|-------------|------------------|------------------|--------------------------|-----------------------|-----------|------------|-----------------------------------------|-----------------------------------------|-----------------------------------|---------------------------------|-----------------------------------------|-------------------------------------|------------------------------------|---------------------------------|-------------------------------------------|
| CO   | 2.38       | 1.73        | 0.48             | -2.20            | 0.07                     | 33.62                 | 0.95      | 135.43     | -302.54                                 | -653.29                                 | -1021.36                          | -1856.66                        | -4991.58                                | -287.75                             | -7322.44                           | -136.41                         | 0.80                                      |
| SBO  | 0.8        | 1.59        | 0.80             | -2.25            | 0.26                     | 58.85                 | 9.67      | 245.08     | -273.70                                 | -647.32                                 | -1498.66                          | -369.32                         | -704.83                                 | -328.87                             | -1403.02                           | -121.99                         | 0.87                                      |
| FSO  | 0.12       | 0.69        | 1.73             | -2.42            | 0.24                     | 49.26                 | 21.39     | 218.44     | 0.00                                    | -235.79                                 | -235.79                           | -132.82                         | -325.20                                 | -138.12                             | -1014.14                           | -432.34                         | 0.41                                      |
| PSO  | 0.07       | 0.79        | 1.54             | -2.34            | 0.66                     | 36.50                 | 27.40     | 173.38     | 0.00                                    | -66.67                                  | -66.67                            | -138.06                         | -1213.21                                | -40.94                              | -1611.35                           | -193.48                         | 0.22                                      |
| SO   | 3.83       | 0.89        | 0.14             | -1.03            | 0.54                     | 32.89                 | 1.59      | 133.16     | 0.00                                    | -652.52                                 | -652.52                           | -105.60                         | -195.39                                 | -74.22                              | -446.48                            | -350.36                         | 12.26                                     |
| PNO  | 3.78       | 0.08        | 1.01             | -1.09            | 0.13                     | 56.15                 | 2.24      | 226.85     | -710.32                                 | -110.26                                 | -948.17                           | -73.34                          | -206.35                                 | -229.84                             | -509.53                            | -353.50                         | 6.88                                      |
| RO   | 4.06       | 1.17        | 0.00             | -1.17            | 0.15                     | 41.79                 | 7.52      | 174.68     | -686.02                                 | -238.02                                 | -993.92                           | -247.21                         | -493.42                                 | 0.00                                | -1091.95                           | -212.61                         | 5.07                                      |
| POL  | 6.04       | 1.72        | -0.43            | -1.14            | 0.15                     | 75.21                 | 2.22      | 303.04     | -368.59                                 | -357.37                                 | -1640.28                          | -187.95                         | -439.52                                 | -175.24                             | -802.71                            | -196.87                         | 1.113                                     |
| CMO  | 1.78       | 1.14        | -0.69            | -0.46            | 0.81                     | 20.23                 | 2.25      | 83.16      | -283.95                                 | 0.00                                    | -283.95                           | -176.79                         | 0.00                                    | 0.00                                | -3729.76                           | -248.26                         | 0.71                                      |
| HSSO | 2.13       | 2.87        | -1.38            | -1.49            | 0.02                     | 15.41                 | 0.15      | 61.80      | -1290.24                                | 0.00                                    | -1311.74                          | -308.46                         | -1025.27                                | -140.01                             | -1473.74                           | -63.34                          | 0.83                                      |



Note: OSI: oxidative stability index;  $\Delta$ : Increment of data; PLO: Palm olein; CO: Corn Oil; PSO: Perilla Seed Oil; PNO: Peanut Oil; CMO: Camellia seed Oil; RO: Rapeseed oil; SBO: Soybean Oil; HSSO: High Oleic Acid Sunflower Seed Oil; FSO: Flaxseed Oil; SO: Sesame Oil.
